# Supplementary material for: Endothelial microparticle-associated protein disulfide isomerase increases platelet activation in diabetic coronary heart disease
Source: publisher site journal article supplement (doi:10.18632/aging.203316), 2021-07-20
Supplement: Supplementary file [file aging-v13i14-203316-supplementary-material-SD1.pdf]

**SUPPLEMENTARY FIGURE**

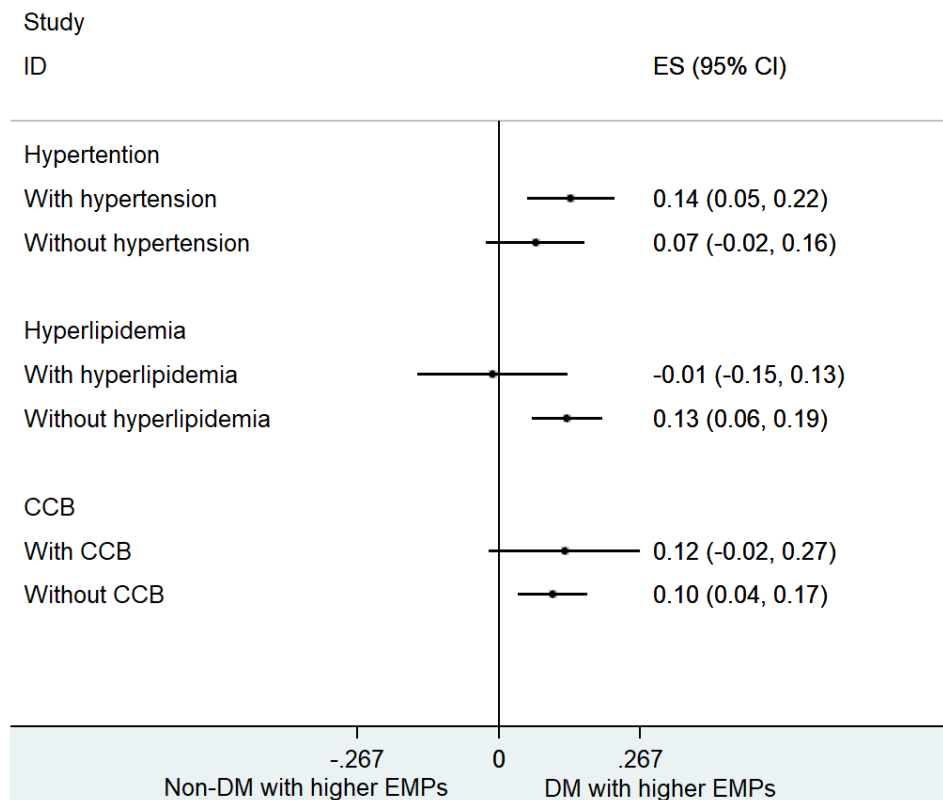

**Supplementary Figure 1. Forest plot of subgroup analysis for hypertension, hyperlipidemia, and application of CCB.** The figure presents the adjusted beta coefficients of diabetes in each subgroup.
